# Supplementary material
Source: publisher figshare collection journal article supplement (https://acs.figshare.com/ndownloader/files/3803689)
Supplement: Supplementary file 1 [file 3803689]

Supporting information

**Electrokinetic control of bacterial deposition and transport**

Jinyi Qin<sup>1</sup>, Xiaohui Sun<sup>2</sup>, Yang Liu<sup>2</sup>, Tom Berthold<sup>1</sup>, Hauke Harms<sup>1</sup>, Lukas Y. Wick<sup>1,2\*</sup>

<sup>1</sup> *UFZ - Helmholtz Centre for Environmental Research, Department of Environmental Microbiology, 04318 Leipzig, Germany*

<sup>2</sup> *University of Alberta, Department of Civil and Environmental Engineering, 3-133 Markin/CNRL Natural Resources Engineering Facility, Edmonton, AB, T6G 2W2, Canada*

The revised supporting information contains 17 Pages, 8 Figures and 2 Tables.

\* Corresponding author: Mailing address: Helmholtz Centre for Environmental Research - UFZ. Department of Environmental Microbiology; Permoserstrasse 15; 04318 Leipzig, Germany. phone: +49 341 235 1316, fax: +49 341 235 1351, e-mail: [lukas.wick@ufz.de](mailto:lukas.wick@ufz.de).

## 1 Theory and Calculations

2

### 3 *Calculation of the collision efficiency ( $\alpha_t$ )*

4 The collision efficiency ( $\alpha_t$ ) of bacteria was calculated applying the clean-bed filtration  
5 theory <sup>1</sup> (eq. 2). The  $\alpha_t$  of bacteria is defined as the ratio of the rate of attachment ( $n_t$ ) to the  
6 rate of bacterial transport to the surfaces ( $n_{trans}$ ). Therefore,  $\alpha_t$  represents the relative affinity  
7 of bacteria for the packing material and  $\alpha_{t,0}$  represents the initial collision efficiency. DC free  
8 control runs ( $\alpha_{t,control}$ ) and runs in the presence of an electric field ( $\alpha_{t,DC}$ ) are subject to the  
9 different percolation regimes and were compared with the percentage change was

$$10 \quad \text{Percentage change} = \frac{\alpha_{t,control} - \alpha_{t,DC}}{\alpha_{t,0}} \times 100 \quad (1)$$

11 Values of  $n_{trans}$  were calculated taking into account the contributions of convection, diffusion,  
12 van der Waals attraction, and sedimentation <sup>2</sup>. For the calculations, we assumed spheres of  
13 identical size glass beads (diameter: 0.1 mm) in their closest packing, and identical effective  
14 bacterial radius (1  $\mu\text{m}$ ) of the bacteria. Values of  $n_t$  were calculated from  $C/C_0$  values  
15 obtained in column experiments.

$$16 \quad C = C_0 \exp\left(-\frac{3(1-\varepsilon)}{4a_s} n_{trans} \alpha_t L\right) \quad (2)$$

17 where  $C$  is the effluent cell concentration,  $C_0$  the influent cell concentration,  $\varepsilon$  the porosity of  
18 the packed bed,  $a_s$  the radius of the glass beads,  $L$  the length of the column, and  $n_t$  the  
19 transport of bacteria from the solution to the glass surface in the whole experimental time.

20  $n_{trans}$  was approximated by applying the solution to convection-diffusion equation (eq. 3):

$$21 \quad n_{trans} = A_s \frac{A_{132}}{9\pi\eta a_b^2 v} \frac{a_b^{0.125}}{a_s^{1.875}} + 0.00338 A_s \frac{2a_b^2 (\rho_b - \rho_l) g^{1.2}}{9\eta v} \frac{a_b^{-0.4}}{a_s} + 4 A_s^{0.33} \frac{12\nu a_s \pi \eta a_b^{-0.67}}{kt} \quad (3)$$

$$22 \quad A_s = \frac{2(1-(1-\varepsilon)^{1.67})}{2-3(1-\varepsilon)+3(1-\varepsilon)^{1.67}-2(1-\varepsilon)^2} \quad (4)$$

23 with  $\varepsilon$  being the porosity of column (0.41),  $a_b$  and  $a_s$  are the radii of bacteria ( $a_b = 10^{-6}$  m) and  
24 the glass beads ( $a_s = 5 \times 10^{-5}$  m), respectively,  $\eta$  and  $\rho_l$  are the absolute viscosity ( $\eta = 3.19$  kg  
25  $\text{m}^{-1} \text{h}^{-1}$ ) and density of buffer solution ( $\rho = 1000$  kg  $\text{m}^3$ ),  $v$  is the approach velocity ( $1.1 \times 10^{-4}$

26  $\text{m s}^{-1}$ ),  $g$  is the gravitational acceleration ( $9.81 \text{ ms}^{-2}$ ),  $k$  is the Boltzmann constant ( $1.38 \times 10^{-23}$   
 27  $\text{J K}^{-1}$ ),  $t$  is the room temperature of 293K.  $\rho_b$  is the density of the bacteria solution, ( $\rho_b = 1090$   
 28  $\text{kg m}^{-3}$ ) and  $A_{132}$  is the Hamaker constant<sup>2</sup> as described by eq. 5<sup>3</sup>

$$29 \quad A_{132} = (\sqrt{A_{11}} - \sqrt{A_{33}})(\sqrt{A_{22}} - \sqrt{A_{33}}) \quad (5)$$

30 Here,  $A_{ii}$  denotes the individual Hamaker constant of bacteria ( $A_{11}$ ), glass ( $A_{22}$ ) and water  
 31 ( $A_{33}$ ), respectively.  $A_{33}$  was taken from literature<sup>4</sup> whereas  $A_{11}$  and  $A_{22}$  were obtained by eq. 6  
 32<sup>5</sup>.

$$33 \quad A_{ii} = 6\pi l_0^2 \gamma_i^{LW} \quad (6)$$

34 According to Fowkes<sup>5</sup>, the value of  $6\pi l_0^2$  equals  $1.44 \times 10^{-18} \text{ m}^2$ , with  $l_0$  being the minimum  
 35 distance between the outermost cell surface and the glass bead (0.157 nm)<sup>6</sup>. Thus, the  
 36 individual and effective Hamaker constants in media were assessed in Table S2. Derick et al.  
 37 have reported that Hamaker constant ( $A_{132}$ ) values range from 0.28 to  $3.46 \times 10^{-21} \text{ J}$  for quartz  
 38 surface<sup>6</sup>. For the interaction of cellulose with  $\text{SiO}_2$ , the Hamaker constant was in the range of  
 39 0.32 - 0.38<sup>7</sup>. The value of the Hamaker constant used in our study is consistent with these  
 40 values.

41

#### 42 ***Calculations of surface coverage and the fraction of bacteria retained***

43 Assuming that the entire glass surface allows for irreversible adhesion, the fraction of  
 44 bacterial coverage on the surface can be described by eq. 7:

$$45 \quad \theta = \frac{N_b \pi a_b^2}{N_s 4\pi a_s^2} \quad (7)$$

46 where  $N_s$  and  $N_b$  are the numbers of collectors and bacteria in the column and  $a_b$  and  $a_s$  the  
 47 radii of bacteria and the collectors, respectively<sup>8</sup>.

48 The fraction of bacteria retained in the column,  $R$  is calculated by eq. 8:

$$49 \quad R = \int (1 - \frac{C}{C_0}) \cdot dV \quad (8)$$

50 where  $C$  and  $C_0$  are the effluent and influent cell concentrations of the column, and  $V$  the flow  
 51 of the cell suspension ( $V = 19 \text{ ml h}^{-1}$ ) through the column<sup>9,10</sup>.

52

53 **Calculation of XDLVO interaction energy of bacterial adhesion**

54 According to the extended DLVO theory <sup>11</sup>, the XDLVO interaction energy of bacterial  
 55 adhesion ( $G_{XDLVO}$ ) is composed of the acid-base ( $G_{AB}$ ) interaction energy, the electrostatic  
 56 repulsion ( $G_{EDL}$ ), and the Lifshitz-van der Waals ( $G_{LW}$ ) energy (eq. 9) <sup>11</sup>:

57 
$$G_{XDLVO} = G_{AB} + G_{EDL} + G_{LW} \quad (9)$$

58 **Acid-base interaction energy ( $G_{AB}$ ).** The acid-base interaction energy ( $G_{AB}$ ) depends on the  
 59 Gibbs free energy of the bacteria and the glass as given by eq. 10, in which  $a_b$  is the radius of  
 60 bacteria (1  $\mu\text{m}$ ), and  $h$  is the separation distance between the bacterium and the surface. The  $\lambda$   
 61 is the characteristic decay length of AB interaction in water (estimated 0.6nm) <sup>11</sup>.

62 
$$G_{AB} = 2\pi a_b \Delta G^{AB} \lambda \exp\left(-\frac{l_0 - h}{\lambda}\right) \quad (10)$$

63  $\Delta G^{AB}$  is the acid-base component of the free energy interaction at contact given by eq. 11 <sup>12, 13</sup>

64 
$$\Delta G^{AB} = 2 \left[ \begin{array}{l} (\sqrt{\gamma_b^+} - \sqrt{\gamma_s^+})(\sqrt{\gamma_b^-} - \sqrt{\gamma_s^-}) - (\sqrt{\gamma_b^+} - \sqrt{\gamma_l^+})(\sqrt{\gamma_b^-} - \sqrt{\gamma_l^-}) \\ - (\sqrt{\gamma_s^+} - \sqrt{\gamma_l^+})(\sqrt{\gamma_s^-} - \sqrt{\gamma_l^-}) \end{array} \right] \quad (11)$$

65

66 The surface Gibbs free energies of bacteria  $\gamma_b$  and the glass surface  $\gamma_s$  ( $\text{mJ m}^{-2}$ ) were  
 67 calculated based on measured contact angles ( $\theta$ ) of microbial lawns, membrane filters and  
 68 glass surfaces using water, formamide and methylene iodide as liquids using the Young  
 69 equation according to eq. 12:

70 
$$\cos(\theta) = -1 + 2 \frac{\sqrt{\gamma_b^{LW} \gamma_l^{LW}}}{\gamma_l^{total}} + 2 \frac{\sqrt{\gamma_b^+ \gamma_l^-}}{\gamma_l^{total}} + 2 \frac{\sqrt{\gamma_b^- \gamma_l^+}}{\gamma_l^{total}} \quad (12)$$

71 The total surface Gibbs free energies ( $\gamma^{total}$ ) thereby were separated in a Lifshitz-van der  
 72 Waals ( $\gamma^{LW}$ ) and an acid-base component ( $\gamma^{AB}$ ) (eq. 13) with  $\gamma^+$  and  $\gamma^-$  as the electron acceptor  
 73 and the electron donor components of acid-base surface energy (eqs. 13 & 14).

74 
$$\gamma^{total} = \gamma^{AB} + \gamma^{LW} \quad (13)$$

75 
$$\gamma_i^{AB} = 2\sqrt{\gamma_i^+ \gamma_i^-} \quad (14)$$

76 Using literature data <sup>14</sup> of  $\gamma$ ,  $\gamma^{LW}$ ,  $\gamma^+$ ,  $\gamma^-$  values for water, formamide and methyleneiodide, the  
 77 parameters  $\gamma_b$ ,  $\gamma_b^{LW}$ ,  $\gamma_b^+$ ,  $\gamma_b^-$  of bacteria were calculated as proposed by van Oss et al<sup>15</sup>, and the  
 78 data from literature taken for assessing the free energy of the glass surface <sup>16</sup>.

79

80 **Electrostatic repulsion energy, ( $G_{EDL}$ ).** The electrostatic repulsion energy between bacteria  
 81 and the glass surface was calculated by eq. 15 <sup>11</sup>:

$$82 \quad G_{EDL} = \pi \epsilon_0 \epsilon_r a_b \left\{ 2 \xi_b \xi_s \ln \left[ \frac{1 + \exp(-\kappa h)}{1 - \exp(-\kappa h)} \right] + (\xi_b^2 + \xi_s^2) \ln [1 - \exp(-2\kappa h)] \right\} \quad (15)$$

83 where  $\kappa^{-1}$  is the thickness of electrical double layer (EDL, nm) as calculated by the Guoy-  
 84 Chapman theory with  $C$  and  $z$  being the molar bulk concentration and the charge number of  
 85 the electrolytes<sup>14</sup> (eq. 16).

$$86 \quad \kappa^{-1} = \left[ 3.29 z C^{1/2} \right]^{-1} \quad (16)$$

87 For a 10 mM and a 100 mM buffer solution, a  $\kappa^{-1}$  of 2.15 nm (10 mM buffer) and  $\kappa^{-1}$  of 0.65  
 88 nm (100 mM buffer) were calculated.

89

90 **Lifshitz-van der Waals interaction energy ( $G_{LW}$ ).** With given values of the effective  
 91 Hamaker constant, the Lifshitz-van der Waals interaction energy can be calculated by eq. 17  
 92 <sup>13-15, 17</sup>

$$93 \quad G_{LW} = -\frac{A_{132}}{6} \left[ \frac{2a_b(h+a_b)}{h(h+2a_b)} - \ln\left(\frac{h+2a_b}{h}\right) \right] \quad (17)$$

94

95 **Tables**

96

97

98 **Table S1.** Overview of the surface free energy ( $\gamma$ ) and the contact angles of water  $\theta_w$ ,  
 99 methylene iodide  $\theta_m$  and formamide  $\theta_f$  of glass and bacterial lawns of *P. fluorescens* Lp6a.

|                                   | Contact angle ( $\theta$ ) |            |            | Surface free energy $\gamma$ ( $\text{mJ m}^{-2}$ ) <sup>1</sup> |            |                      |                      |                       |
|-----------------------------------|----------------------------|------------|------------|------------------------------------------------------------------|------------|----------------------|----------------------|-----------------------|
|                                   | $\theta_w$                 | $\theta_f$ | $\theta_m$ | $\gamma^-$                                                       | $\gamma^+$ | $\gamma^{\text{AB}}$ | $\gamma^{\text{LW}}$ | $\gamma^{\text{Tot}}$ |
| <b>Water</b>                      |                            |            |            | 25.5                                                             | 25.5       | 51                   | 21.8                 | 72.8                  |
| <b>Formamide</b>                  |                            |            |            | 39.6                                                             | 2.3        | 19                   | 39                   | 58                    |
| <b>Methyleneiodide</b>            |                            |            |            | <0.1                                                             | <0.1       | $\approx 0$          | 50.8                 | 50.8                  |
| <b><i>P. fluorescens</i> Lp6a</b> | 16.1                       | 35.1       | 54.4       | 61.7                                                             | 0.9        | 14.8                 | 31.7                 | 46.5                  |
| <b>Glass</b>                      | 23                         | 16         | 53         | 50.8                                                             | 3          | 24.8                 | 32.4                 | 57.2                  |

100 <sup>1</sup> Data for water, formamide, methyleneiodide and glass taken from: <sup>6, 18</sup>.

101

102

103

104

105 **Table S2.** Overview of the individual Hamaker constants ( $A_{ii}$ ) of the bacteria ( $A_{11}$ ), glass ( $A_{22}$ ),  
 106 and water ( $A_{33}$ ), respectively. The calculated effective Hamaker constant is denoted by  $A_{123}$ .

|                                                                    | $A_{11}$    | $A_{22}$    | $A_{33}$  | $A_{132}$  |
|--------------------------------------------------------------------|-------------|-------------|-----------|------------|
| <b><i>P. fluorescens</i> Lp6a (<math>\times 10^{-21}</math> J)</b> | <b>45.6</b> | <b>46.7</b> | <b>37</b> | <b>0.5</b> |

107

108

109 **References**

- 110 1. Velasco-Casal, P.; Wick, L. Y.; Ortega-Calvo, J. J., Chemoeffectors decrease the deposition of  
 111 chemotactic bacteria during transport in porous media. *Environ Sci Technol* **2008**, *42*, (4),  
 112 1131-1137.
- 113 2. Martin, R. E.; Bouwer, E. J.; Hanna, L. M., Application of Clean-Bed Filtration Theory to  
 114 Bacterial Deposition in Porous-Media. *Environ Sci Technol* **1992**, *26*, (5), 1053-1058.
- 115 3. Van Oss, C. J.; Good, R. J.; Chaudhury, M. K., The Role of van der Waals Forces and  
 116 Hydrogen Bonds in "Hydrophobic Interactions" between Biopolymers and Low Energy  
 117 Surfaces. *J Colloid Interface Sci* **1985**, *111*, (2).
- 118 4. Vilinska, A.; Rao, K. H., Surface thermodynamics and extended DLVO theory of  
 119 *Leptospirillum ferrooxidans* cells' adhesion on sulfide minerals. *Miner Metall Proc* **2011**, *28*,  
 120 (3), 151-158.
- 121 5. Fowkes, F. M., Attractive Forces at Interfaces. *Ind Eng Chem* **1964**, *56*, (12), 40-&.
- 122 6. Brown, D. G.; Jaffe, P. R., Effects of nonionic surfactants on the cell surface hydrophobicity  
 123 and apparent hamaker constant of a *Sphingomonas sp.* *Environ Sci Technol* **2006**, *40*, (1), 195-  
 124 201.
- 125 7. Bergström, L.; Stemme, S.; Dahlfors, T.; Arwin, H.; Ödberg, L., Spectroscopic Ellipsometry  
 126 Characterisation and Estimation of the Hamaker Constant of Cellulose. *Cellulose* **1999**, *6*, (1),  
 127 1-13.
- 128 8. Johnson, W. P.; Blue, K. A.; Logan, B. E.; Arnold, R. G., Modeling Bacterial Detachment  
 129 during Transport through Porous-Media as a Residence-Time-Dependent Process. *Water*  
 130 *Resour Res* **1995**, *31*, (11), 2649-2658.
- 131 9. Jewett, D. G.; Logan, B. E.; Arnold, R. G.; Bales, R. C., Transport of *Pseudomonas*  
 132 *fluorescens* strain P17 through quartz sand columns as a function of water content. *J Contam*  
 133 *Hydro* **1999**, *36*, (1-2), 73-89.
- 134 10. Rijnaarts, H. H. M.; Norde, W., Reversibility and mechanism of bacterial adhesion. *Colloids*  
 135 *Surf B Biointerfaces* **1995**, *4*, 5-22.
- 136 11. Boks, N. P.; Norde, W.; van der Mei, H. C.; Busscher, H. J., Forces involved in bacterial  
 137 adhesion to hydrophilic and hydrophobic surfaces. *Microbiol-Sgm* **2008**, *154*, 3122-3133.
- 138 12. Van Oss, C. J.; Docoslis, A.; Wu, W.; Giese, R. F., Influence of macroscopic and microscopic  
 139 interactions on kinetic rate constants - I. Role of the extended DLVO theory in determining the  
 140 kinetic adsorption constant of proteins in aqueous media, using von Smoluchowski's approach.  
 141 *Colloids Surf B Biointerfaces* **1999**, *14*, (1-4), 99-104.
- 142 13. Vanoss, C. J.; Giese, R. F.; Costanzo, P. M., DLVO and Non-DLVO interactions in Hectorite.  
 143 *Clay Clay Miner* **1990**, *38*, (2), 151-159.
- 144 14. Sharma, P. K.; Rao, K. H., Adhesion of *Paenibacillus polymyxa* on chalcopyrite and pyrite:  
 145 surface thermodynamics and extended DLVO theory. *Colloids Surf B Biointerfaces* **2003**, *29*,  
 146 (1), 21-38.
- 147 15. Van Oss, C. J.; Chaudhury, M. K.; Good, R. J., Interfacial Lifshitz-van der Waals and polar  
 148 interactions in macroscopic systems. *Chem Rev* **1988**, *88*, (6), 927-941.
- 149 16. Meylheuc, T.; Bellon-Fontaine, M. N., *Pseudomonas fluorescens* - production of biosurfactants  
 150 and impact of their bioadhesive behaviour. **2003**.
- 151 17. Chia, T. W. R.; Nguyen, V. T.; McMeekin, T.; Fegan, N.; Dykes, G. A., Stochasticity of  
 152 Bacterial Attachment and Its Predictability by the Extended Derjaguin-Landau-Verwey-  
 153 Overbeek Theory. *Appl Environ Microb* **2011**, *77*, (11), 3757-3764.
- 154 18. Bolina, A. S.; Wolff, A. J.; Brown, W. A., Reflection absorption infrared spectroscopy and  
 155 temperature-programmed desorption studies of the adsorption and desorption of amorphous  
 156 and crystalline water on a graphite surface. *J Phys Chem B* **2005**, *109*, (35), 16836-45.

157

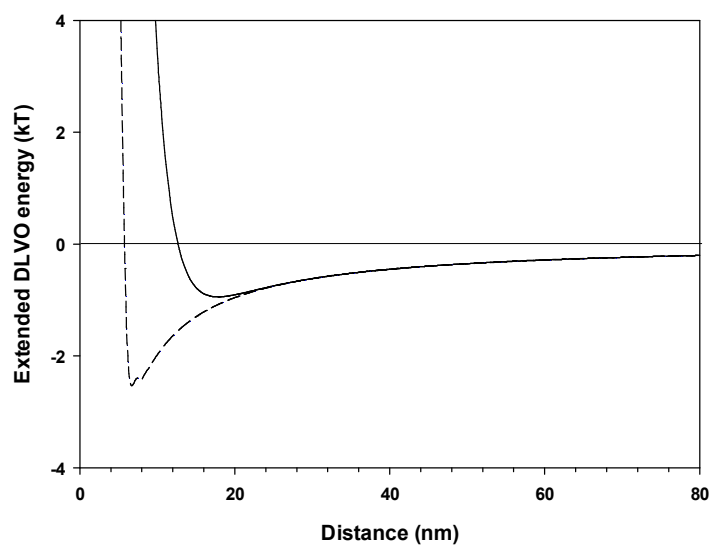

158

159

160 **Figure S1.** Profile of the extended XDLVO interaction energy ( $1 \text{ kT} = 4.0 \times 10^{-21} \text{ J}$ ) as a  
161 function of the distance for *P. fluorescens* Lp6a cell on glass surface in 10 mM (solid line)  
162 and 100 mM (dashed line) buffer solution.

163



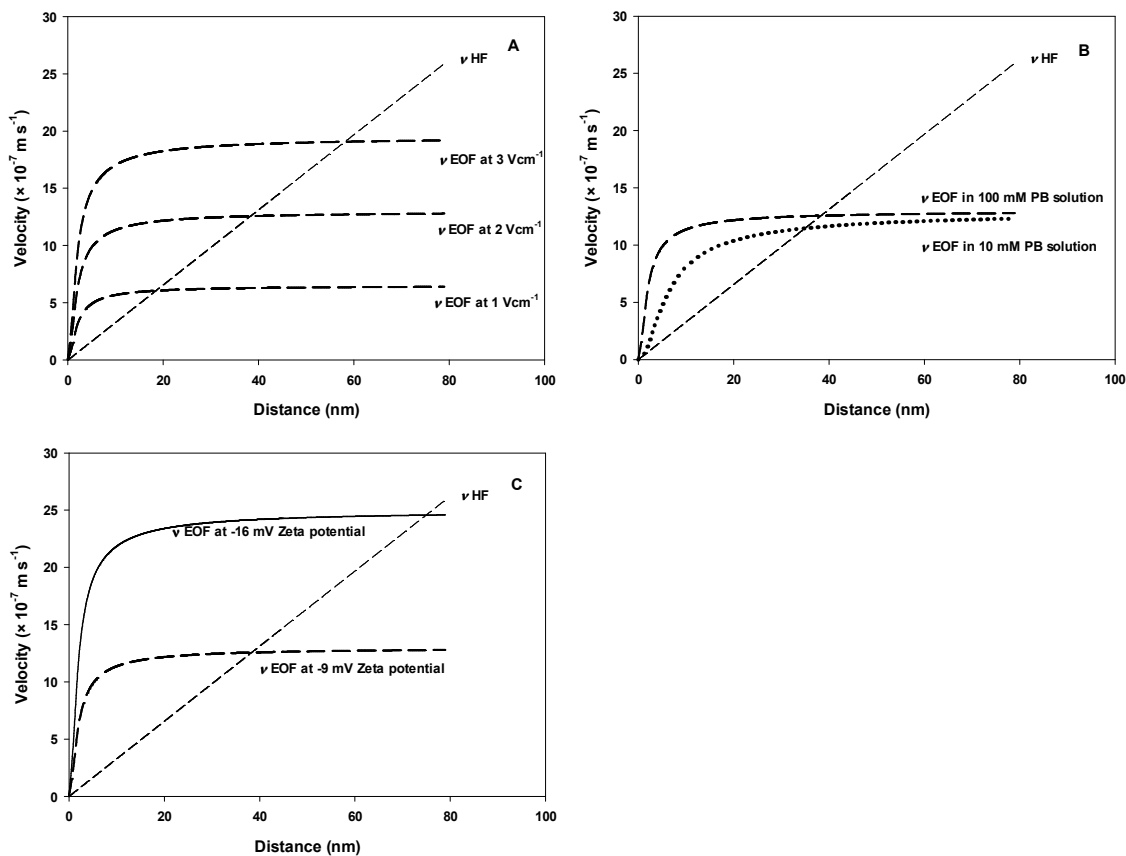

164

165

166

167 **Figure S2.** Calculated velocity profiles of the electroosmotic ( $v_{EOF}$ ; dashed lines) and the  
 168 hydraulic flow ( $v_{HF}$ ; fine dashed line) as a function of the distance to a glass surface at  
 169 varying electric field strengths, ionic strengths and zeta potentials of the glass surfaces. Figure  
 170 S2A:  $\zeta = -9 \text{ mV}$ ; 100 mM buffer,  $X = 1, 2, \text{ or } 3 \text{ V cm}^{-1}$ ; Figure S2B:  $\zeta = -9 \text{ mV}$ ; 10 and 100  
 171 mM buffer,  $X = 2 \text{ V cm}^{-1}$ ; Figure S2C:  $\zeta = -9$  and  $-16 \text{ mV}$ ; 100 mM buffer,  $X = 2 \text{ V cm}^{-1}$ .

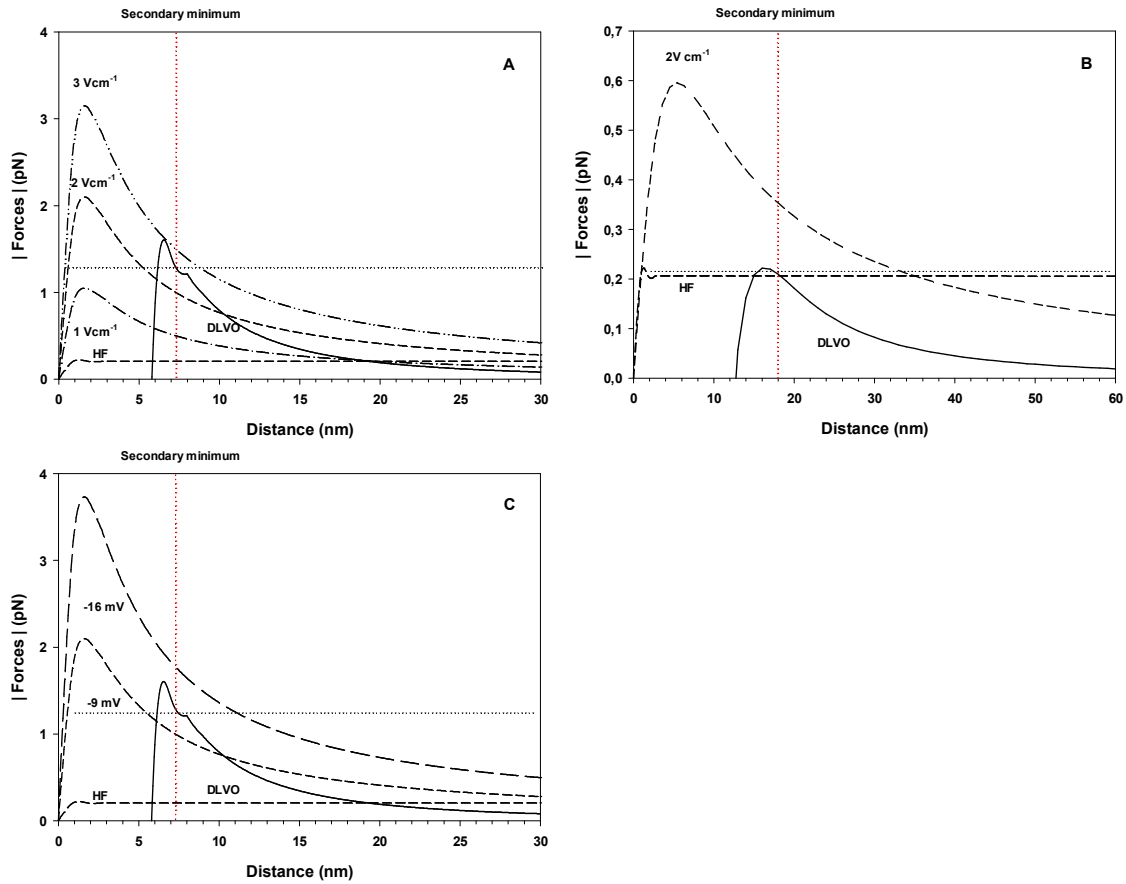

172

173

174 **Figure S3.** Calculated profiles of the shear forces induced by the electroosmotic (big dashed  
 175 lines) and the hydraulic flow (short dashed line) acting on *P. fluorescens* Lp6a cell. Please  
 176 note that the change of  $\zeta$  from  $-9$  mV to  $-16$  mV did not result in printable (i.e. minimal)  
 177 changes of the XDLVO force and hence is not further detailed in the graph. The solid line  
 178 represents the calculated profile of the absolute value of the calculated XDLVO maximum  
 179 attractive force acting on a *P. fluorescens* Lp6a cell. Dotted vertical and horizontal lines  
 180 represent the calculated distance of the secondary minimum and the absolute value of the  
 181 maximum XDLVO attractive force, respectively. Figure S3A:  $\zeta = -9$  mV; 100 mM buffer,  $X =$   
 182 1, 2, or 3 V cm<sup>-1</sup>; Figure S3B:  $\zeta = -9$  mV; 10 mM buffer,  $X = 2$  V cm<sup>-1</sup>; Figure S3C:  $\zeta = -9$  and  
 183  $-16$  mV; 100 mM buffer,  $X = 2$  V cm<sup>-1</sup>.

184

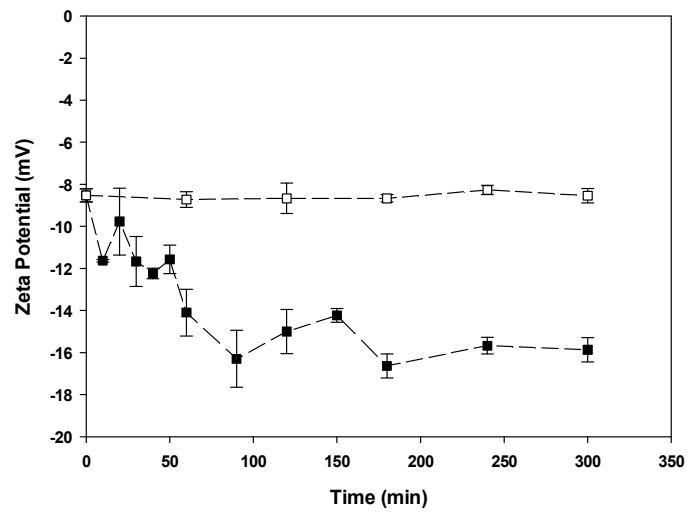

185

186

187 **Figure S4.** Effect of time (300 minutes) on the zeta potential of glass beads (squares) during  
188 exposure of to a bacterial suspension ( $OD_{578} = 0.3$ ; filled squares) and a cell free control  
189 (open squares).

190

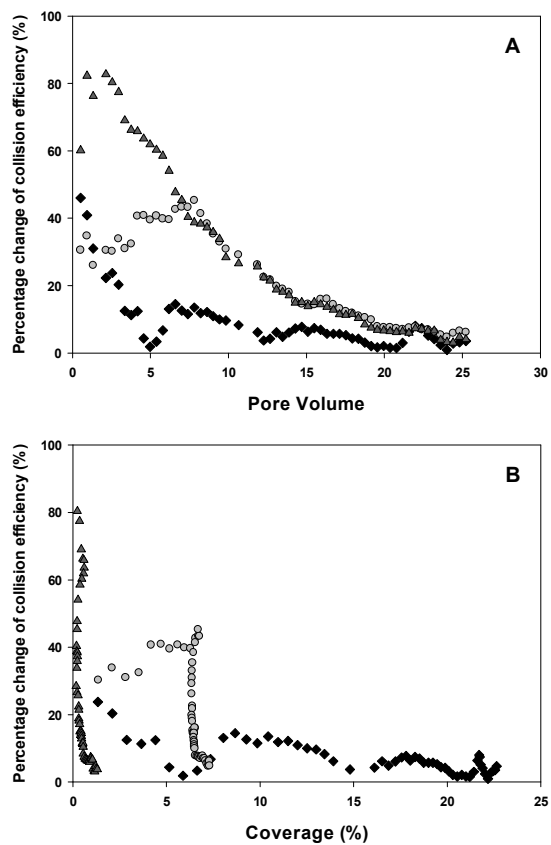

191

192

193 **Figure S5.** The reduction of Collision efficiency was changing as a function of the pore  
 194 volume (Fig. S5A) and bacterial coverage (Fig. S5B): Triangles refer to  $X = 3 \text{ V cm}^{-1}$ , circles  
 195 to  $X = 2 \text{ V cm}^{-1}$  and diamonds to  $X = 1 \text{ V cm}^{-1}$ .

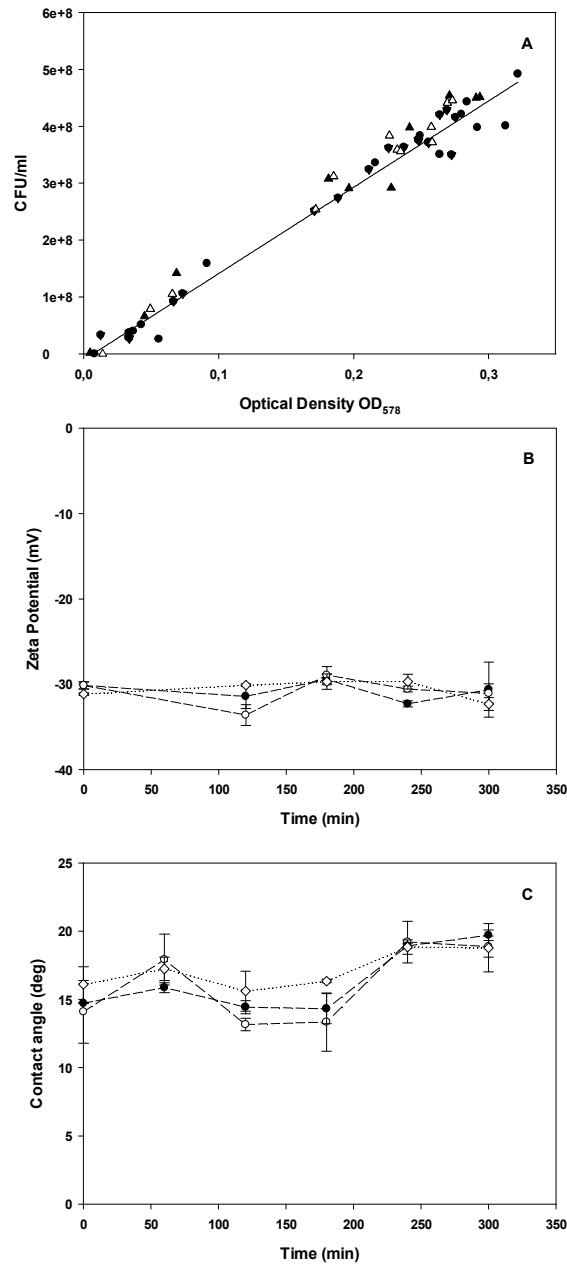

196

197

198 **Figure S6.** Effect of the electrokinetic treatment on the viability, zeta potential and water  
 199 contact angle of *P. fluorescens* Lp6a cells at the outflow of percolation columns filled with  
 200 glass beads the absence (empty symbols) and presence (filled symbols) of an DC electric field  
 201 of  $X = 1 \text{ V cm}^{-1}$  (filled triangles) and  $X = 2 \text{ V cm}^{-1}$  (filled circles) over time. Figure S5A:  
 202 Comparison of the optical density (578 nm) and the colony forming units on LB agar plates  
 203 (cfu) of strain Lp6a in the outflow of the columns; Figure S5B: Zeta potential of outflow cell  
 204 vs time; dotted line represents the zeta potential of the inflowing cells; Figure S5C: Water  
 205 contact angle of outflowing cells over time; dotted line represents the water contact angle of  
 206 the inflowing cells.

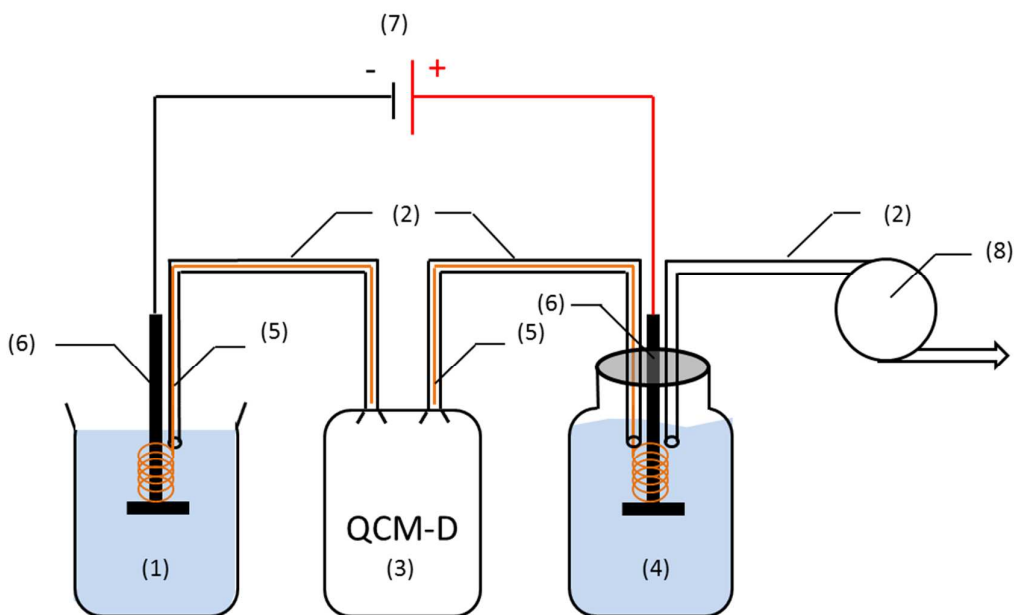

207

208 **Figure S7.** Schematic graph of the quartz crystal microbalance with dissipation measurement  
 209 (QCM-D) under applied DC electric field: By using a peristaltic pump (8) a bacterial  
 210 suspension was withdrawn by underpressure from a reservoir (1) and pumped through the  
 211 QCM-D sensor chamber (3) into a recipient container (4). Disk-shaped Ti/Li electrodes (6)  
 212 were connected to two copper wires (5) that extended electrodes through the Teflon tubing (2)  
 213 to the QCM chamber. A power pack (7) was used to apply a constant DC electric field as  
 214 indicated in the figure.

215

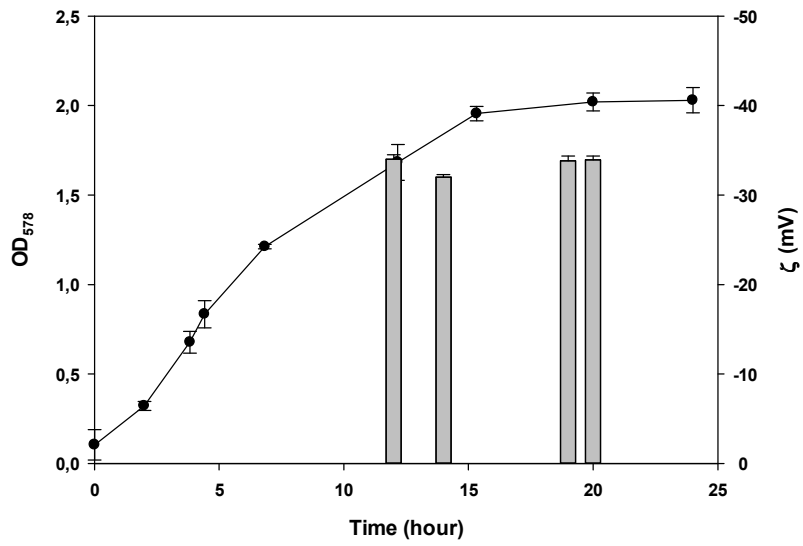

216

217 **Figure S8.** The *LP6a* bacteria growths curve (left) and measured zeta potential  $\zeta$  (bar, right)

218 as function of time

219

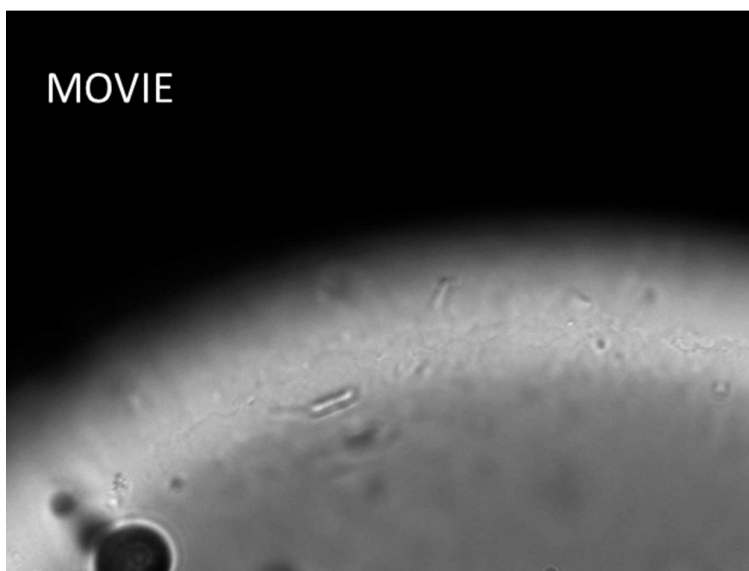

221

222

223

224 **Movie 1.** A 30 s time-lapse video showing the movement of *P. fluorescens* Lp6a cells  
225 attached to glass beads, in the presence and absence of a  $2 \text{ Vcm}^{-1}$  electric field can be found at  
226 <http://pubs.acs.org>. The surface of the glass beads is visible at the bottom of the picture. The  
227 rod-shaped bacteria attached to the surface, is highlighted as red torus. Initially, no electrical  
228 field is applied to the solution. After 10 sec, the electric field was switched on and negatively  
229 charged cell is attracted by the anode. Meanwhile, the induced the EOF moves in the opposite  
230 direction, from anode to the cathode. Prior to the microscopy experiment, a pre-culture of the  
231 bacteria was grown to an  $\text{OD}_{578} = 0.3$  and used to inoculate a culture with sterile glass beads  
232 (0.1 – 0.25 mm diameter) in mineral media with  $1 \text{ gL}^{-1}$  glucose in a flask. This culture was  
233 stationary incubated for 3 days at room temperature to allow cell attachment on the glass  
234 surface. The glass beads were subsequently picked out cautiously and transferred to a glass  
235 bottom dish (50mm  $\mu$ -Dish ,Ibidi GmbH, Munich, Germany) using 1 mL pipette. Glass beads  
236 were rinsed with 3 mL potassium phosphate buffer for three times to wash away non-attached  
237 cells and gently resuspended in buffer solution. The anode and cathode grid electrodes were  
238 applied on the right and left side of petri dish respectively. Attached bacterial cells were  
239 visualized by light microscopy on an Axio Observer.Z1 inverted microscope, using a Plan-  
240 Apochromat 100x/1.4 objective (both Carl Zeiss AG, Oberkochen, Germany) and a frame rate  
241 of 5 fps.

242

243
